# Supplementary material
Source: PubMed Central journal article supplement (PMC3408195)

Supplemental Figure 1

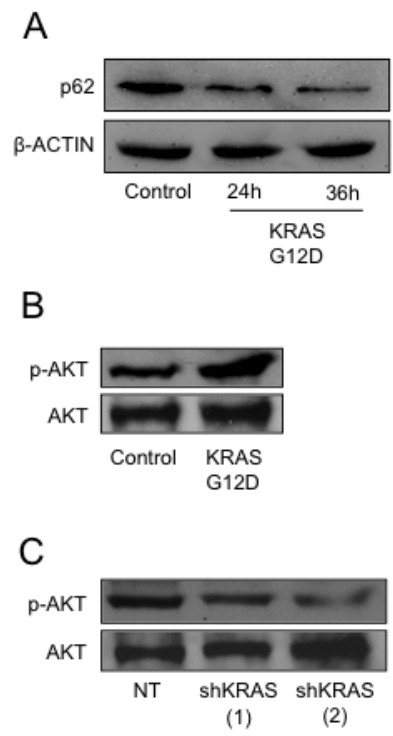

Supplemental Figure 2

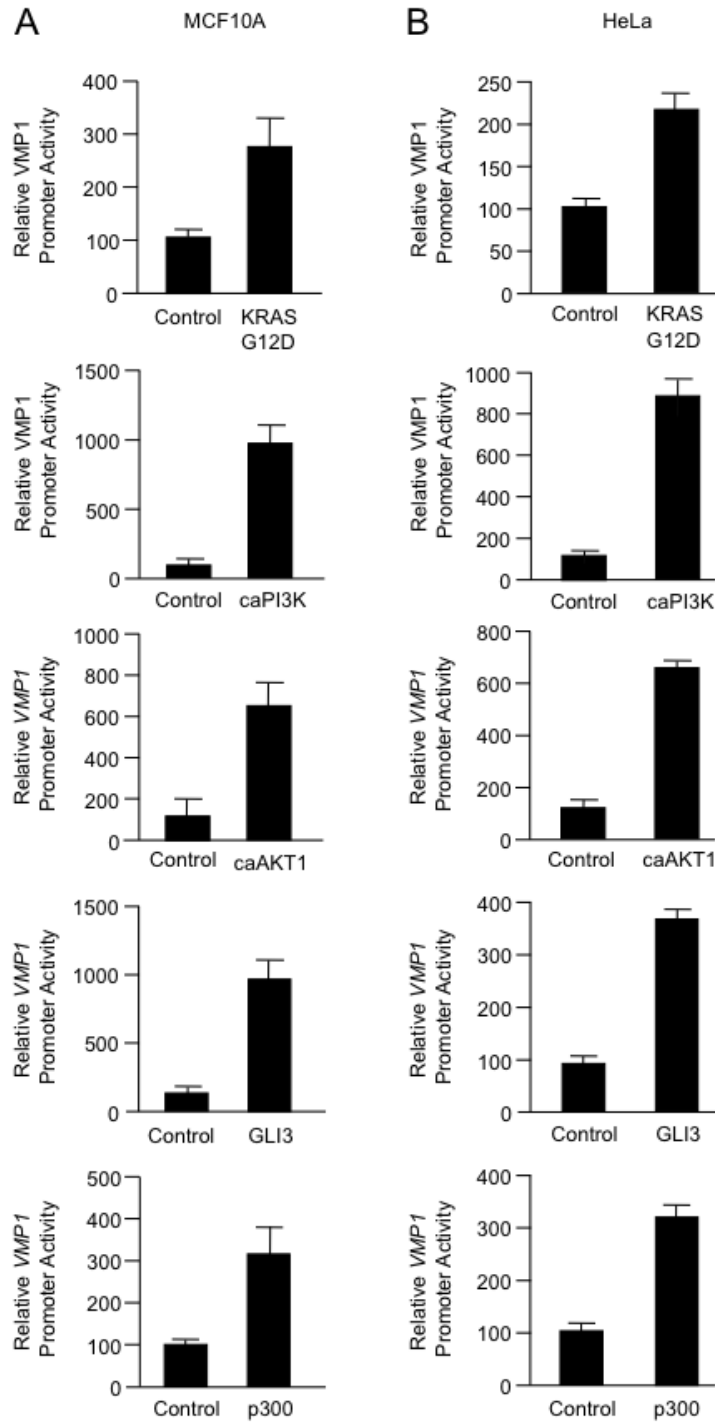

Supplemental Figure 3

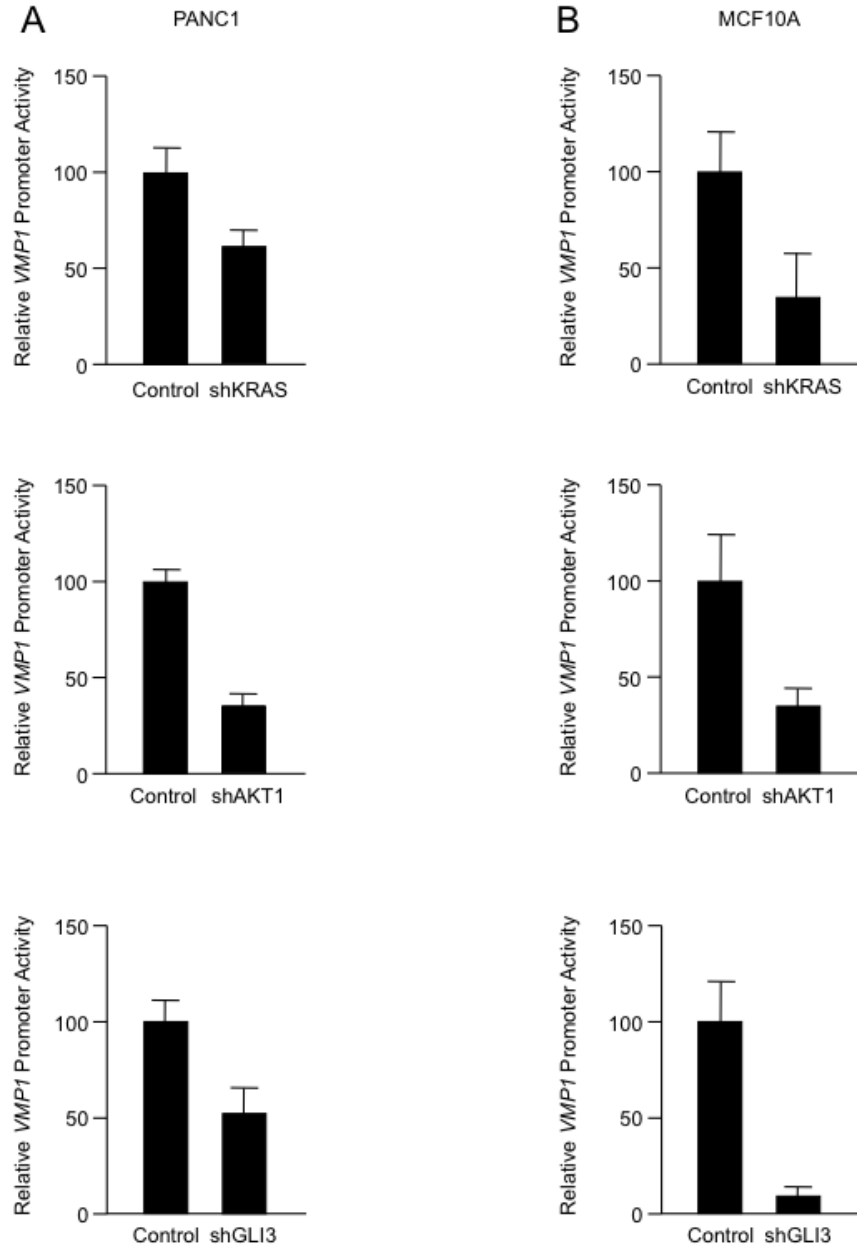

Supplemental Figure 4

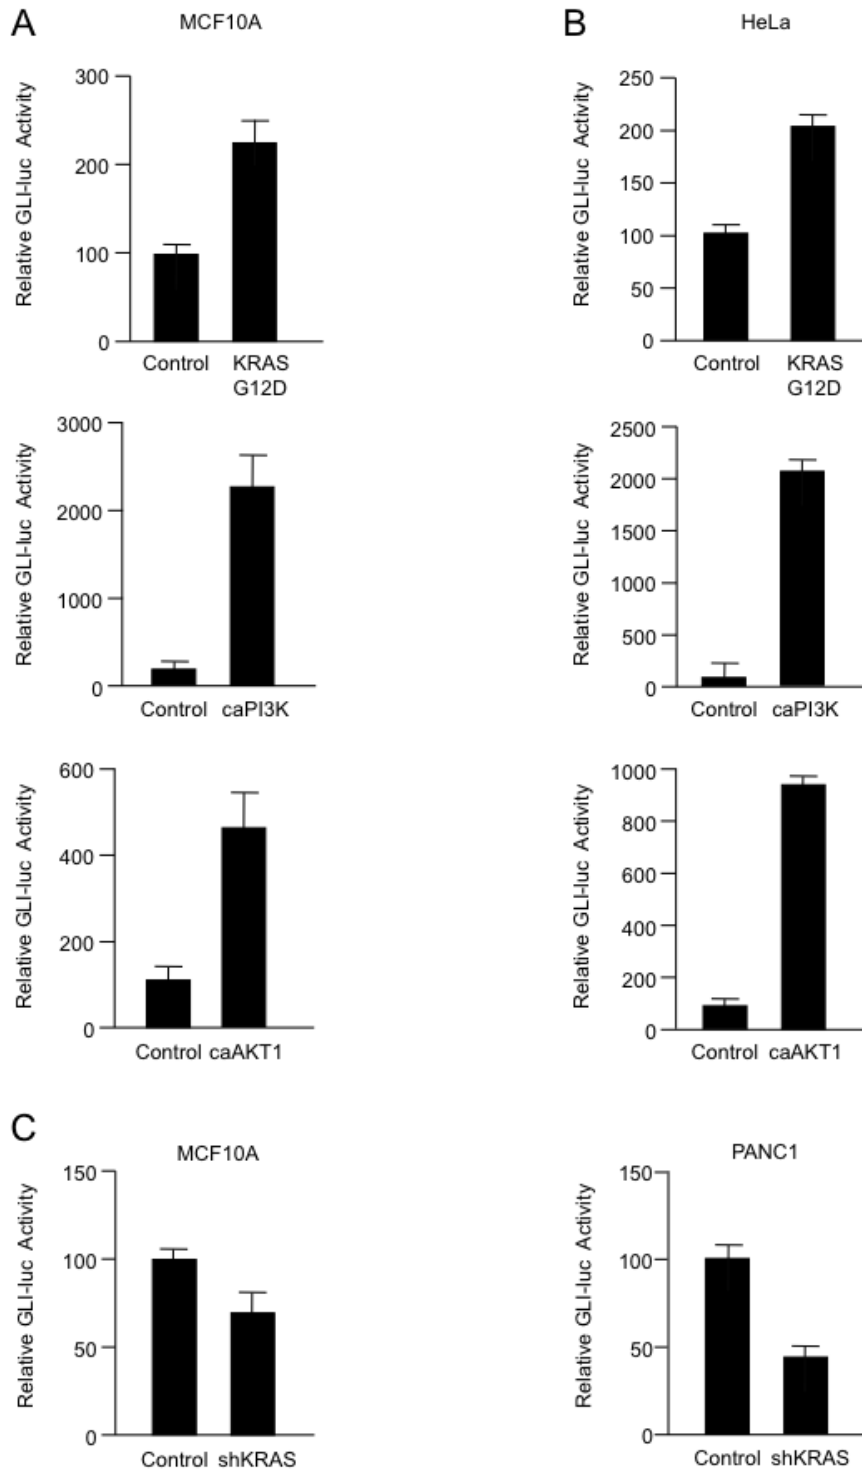

Supplement: supp_M112.370809_Supplemental.pdf [file supp_M112.370809_Supplemental.pdf]
